# Supplementary material for: Neighborhood-Level Public Facilities and COVID-19 Transmission: A Nationwide Geospatial Study In China
Source: Research Square preprint supplement (doi:10.21203/rs.3.rs-117254/v1), 2020-12-03
Supplement: Supplementary file 1 [file 55b3f8582c04dfc06a155a94.docx]

·Supplementary Material for

**Neighborhood-Level Public Facilities and COVID-19 Transmission:**

**A Nationwide Geo-spatial Study in China**

**This PDF file includes:**

Tables S1 to S4

Figure S1 and S2

**Table S1. Description of eight kinds of facilities**

| **Facilities** | **Description** |
| --- | --- |
| Restaurant | Chinese food restaurant, foreign food restaurant, fast food restaurant, leisure food restaurant, coffee House, tea house, ice cream shop, bakery, dessert house |
| Shopping | Convenience store, home electronics hypermarket, supermarket, plants and pet market, home building materials market, comprehensive market, stationary store, sports store, commercial street, clothing store, clothing store |
| Hotel | Hotel |
| Living | Daily life service place, travel agency, information center, information center, ticket office, post office, logistics service, telecom office, professional service firm, job center, water supply service office, electric supply service office, beauty and hairdressing store, repair store, photo finishing, bath and massage center, laundry agency, move service, lottery store, funeral facilities |
| Recreation | Sports stadium, golf related, recreation center, holiday and nursing resort, recreation place, theatre and cinema, park and square |
| Public transit | Airport related, railway station, port and marina, coach station, subway station, light rail station, bus station, commuter bus station, parking lot |
| Education | Museum, exhibition hall, convention and exhibition center, art gallery, library, science and technology museum, planetarium, cultural palace, archives hall, arts organization, media organization, school, research institution, training institution, driving school, transportation service related |
| Health services | Hospital, clinic, emergency center, disease prevention institution, pharmacy |

**Table S2 Correlation matrices* of the eight types of facilities**

|  | **Restaurant** | **Shopping** | **Hotel** | **Living** | **Recreation** | **Traffic** | **Education** | **Health services** |
| --- | --- | --- | --- | --- | --- | --- | --- | --- |
| **Restaurant** | 1.00a |  |  |  |  |  |  |  |
| **Shopping** | 0.91 | 1.00 |  |  |  |  |  |  |
| **Hotel** | 0.75 | 0.74 | 1.00 |  |  |  |  |  |
| **Living** | 0.92 | 0.91 | 0.76 | 1.00 |  |  |  |  |
| **Recreation** | 0.78 | 0.75 | 0.83 | 0.75 | 1.00 |  |  |  |
| **Public transit** | 0.70 | 0.67 | 0.65 | 0.75 | 0.62 | 1.00 |  |  |
| **Education** | 0.85 | 0.82 | 0.73 | 0.88 | 0.73 | 0.76 | 1.00 |  |
| **Health services** | 0.79 | 0.77 | 0.69 | 0.87 | 0.69 | 0.69 | 0.79 | 1.00 |

*: Pearson product-moment correlation coefficient


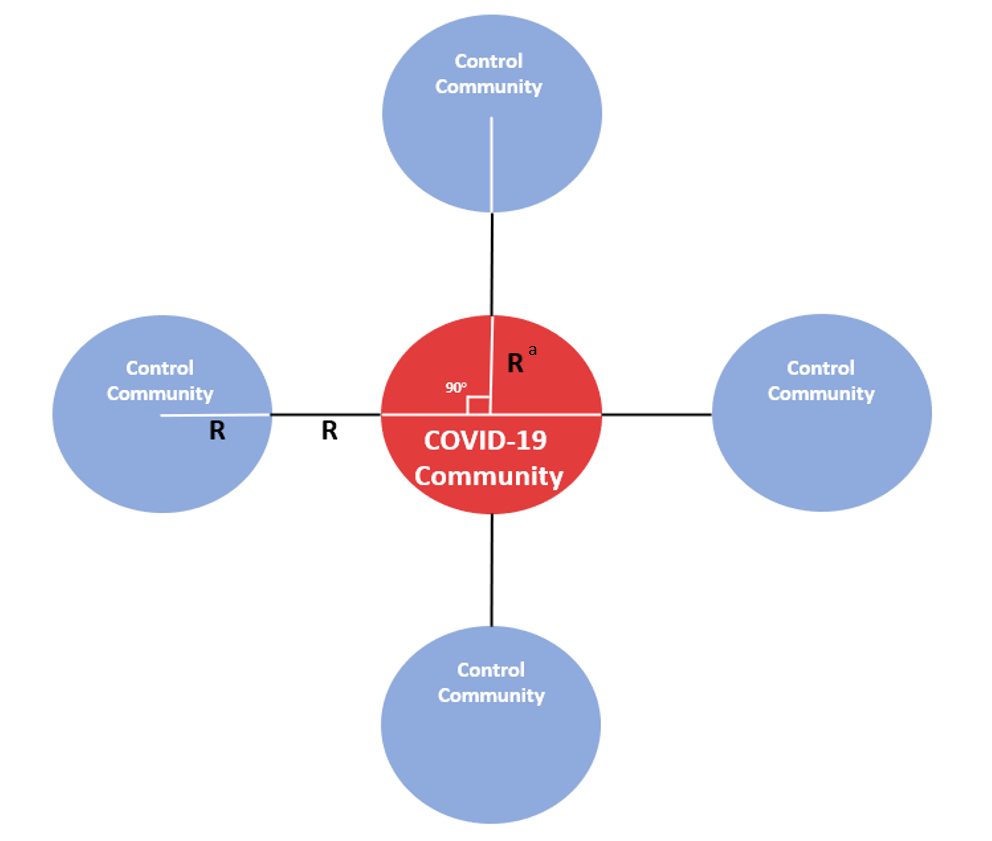


**Figure S1.**

Designing of the case and control selection

* R=1500 m

If the point was not located in a neighborhood, we use a K-nearest-neighbor algorithm to identify the nearest neighborhood to the point


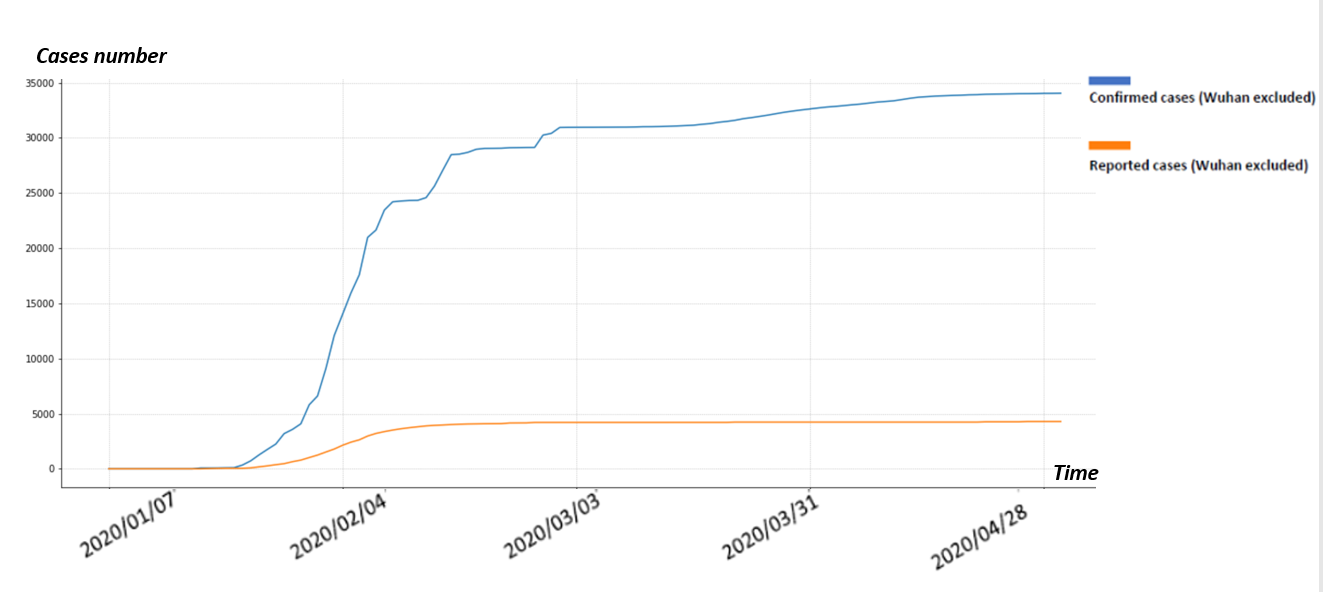


**Figure S2.** Distribution of Reported and Confirmed COVID-19 Cases in China from January 7th to April 30th, 2020

**Table S3. Sensitivity analysis: Association of eight types of public facilities with having COVID cases in the communities using different buffer range**

|  | **800 m buffer** | **1200 m buffer** |
| --- | --- | --- |
|  | **Odds ratio (95% Confidence interval)** a | |
| Restaurant b | 1.52 (1.42, 1.63) | 1.68 (1.58, 1.80) |
| Shopping | 1.64 (1.53, 1.75) | 1.88 (1.76, 2.01) |
| Hotel | 1.55 (1.45, 1.66) | 2.01 (1.88, 2.16) |
| Living | 1.47 (1.38, 1.57) | 1.50 (1.40, 1.60) |
| Recreation | 1.76 (1.65, 1.89) | 1.90 (1.78, 2.04) |
| Public transit | 1.56 (1.45, 1.67) | 1.31 (1.22, 1.40) |
| Education | 1.51 (1.41, 1.61) | 1.72 (1.60, 1.83) |
| Health service | 1.55 (1.45, 1.65) | 3.41 (3.17, 3.66) |

a Model adjusted for city-level variables including population size, Gross Domestic Product, unemployment rate, Government Budget Balance, and resident mobility. Odds ratios from logistic regressions are shown on the left-hand side.

b The reference group was the “lower than the median” for each public facility

**Table S4. Sensitivity analysis: Association of eight types of public facilities with having COVID cases in the communities by using different cut-off point to drop those neighborhoods with lower numbers of public facilities**

| **Total facilities** | **≥1** | **≥3** | **≥5** |
| --- | --- | --- | --- |
| **Number of communities** | **8,139** | **6,379** | **5,913** |
|  | **Odds ratio (95% Confidence interval)** a | | |
| Restaurant b | 1.22 (1.16, 1.29) | 1.69 (1.59, 1.80) | 1.74 (1.63, 1.86) |
| Shopping | 1.27 (1.211, 1.34) | 1.70 (1.60, 1.81) | 1.89 (1.77, 2.02) |
| Hotel | 1.26 (1.19, 1.33) | 1.82 (1.71, 1.93) | 2.00 (1.88, 2.14) |
| Living | 1.14 (1.08, 1.21) | 1.47 (1.38, 1.56) | 1.50 (1.41, 1.60) |
| Recreation | 1.19 (1.13, 1.25) | 1.68 (1.58, 1.79) | 1.74 (1.63, 1.86) |
| Public transit | 1.00 (0.93, 1.06) | 1.30 (1.22, 1.38) | 1.35 (1.26, 1.44) |
| Education | 1.18 (1.12, 1.25) | 1.65 (1.55, 1.75) | 1.70 (1.59, 1.81) |
| Health service | 1.88 (1.78, 1.98) | 2.93 (2.75, 3.12) | 3.22 (3.01, 3.45) |

a Model adjusted for city-level variables including population size, Gross Domestic Product, unemployment rate, Government Budget Balance, and resident mobility. Odds ratios from logistic regressions are shown on the left-hand side.

b The reference group was the “lower than the median” for each public facility
